# Supplementary material for: Cross-species identification of genomic drivers of squamous cell carcinoma development across preneoplastic intermediates
Source: PubMed Central journal article supplement (PMC5013636; doi:10.1038/ncomms12601), 2016-08-30
Supplement: ncomms12601-s1.pdf [file ncomms12601-s1.pdf]

## Supplementary Figures

### Dinucleotide variant proportions

| Change | CC>TT | GG>AA | Other |
|--------|-------|-------|-------|
| NS     | 48    | 39    | 17    |
| AK     | 205   | 276   | 53    |
| SCC    | 580   | 590   | 137   |

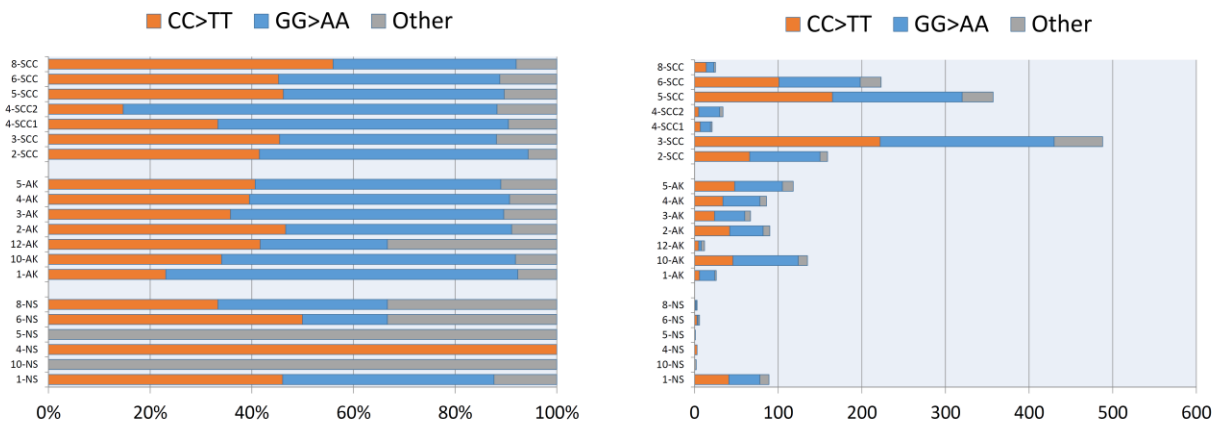

Supplementary Figure 1. Dinucleotide variant proportions. These are described and quantitated for each lesion type.

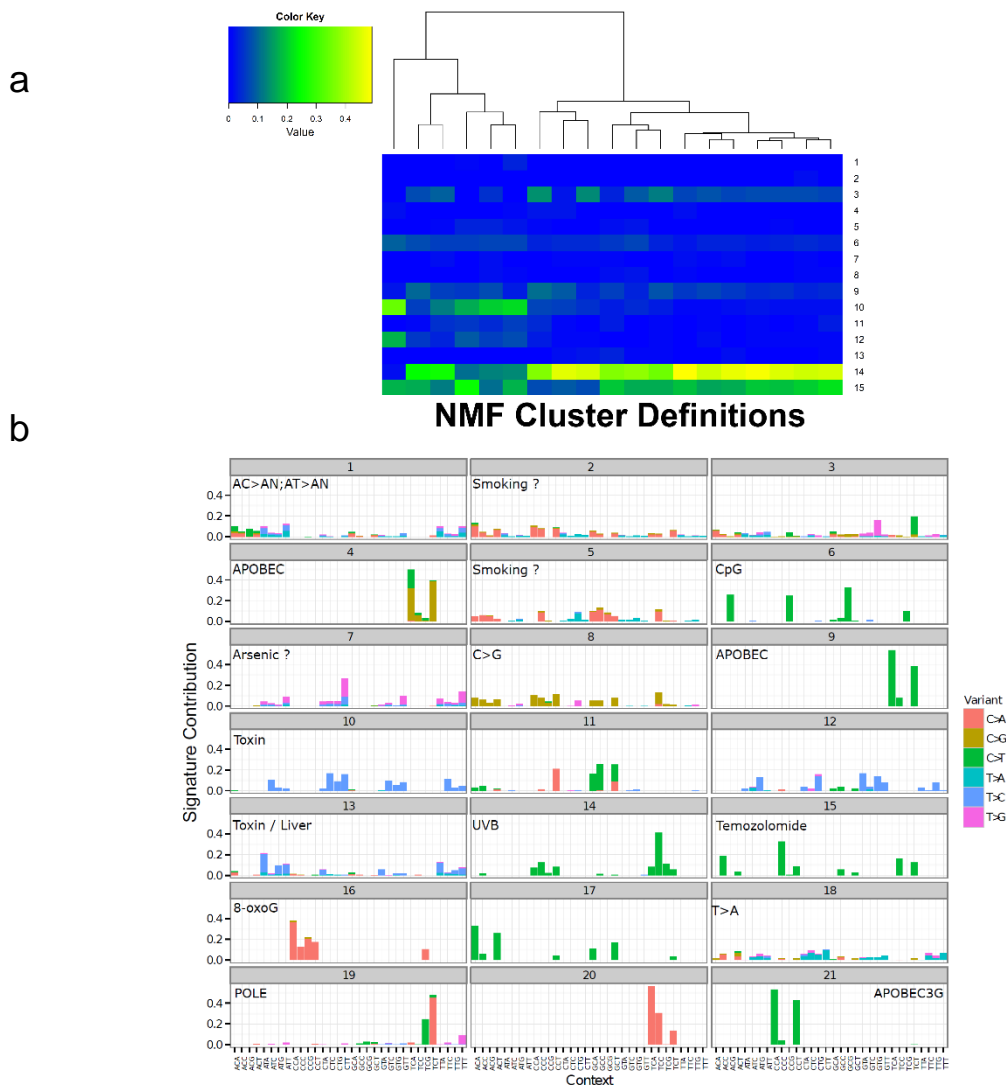

Supplementary Figure 2. Non-negative matrix factorization-derived orthogonal mutational profiles. (a) Heatmap of NMF-derived orthogonal mutational profiles derived from over 6,000 human cancers for the human exome samples. The scale bar refers to the proportion of mutations attributable to a given signature. The clustering confirms a strong enrichment for CpG-associated C→T transitions classically associated with UVB-exposure (signature 14), particularly for AK and cuSCC, with segregation of most of the NS samples away from AK and cuSCC, with the exception of 1-NS, which has the highest mutational load in that class. Two other profiles dominated by C→T transitions are significantly represented in the mutational data and relatively enriched in NS (signatures 10, 15), including one first described in the context of temozolamide exposure (signature 15). (b) Table of NMF Cluster Definitions. Our strategy employed non-smooth NMF, a variant which approximates the data using the basis and

coefficient matrices as above with the addition of a third smoothing matrix which serves to absorb noise within the data, thus driving the coefficient and basis matrices to increase sparseness. The resulting basis matrix generated  $k=21$  signatures from a diverse set of over 6000 cancers<sup>39</sup>, reducing correlations between signatures originally derived by Alexandrov et al.<sup>72</sup> thereby increasing orthogonality.

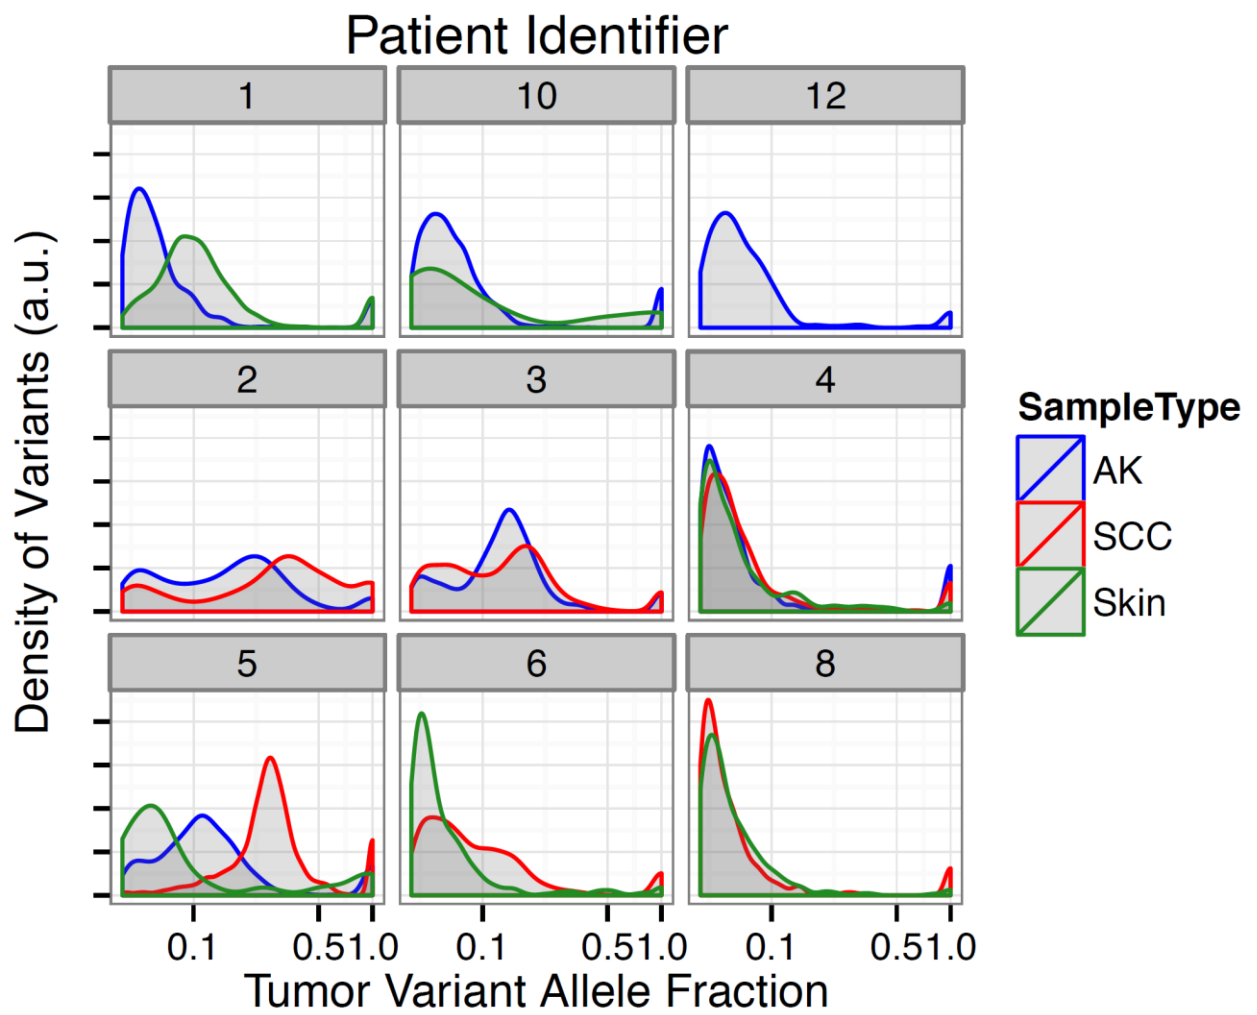

Supplementary Figure 3. Histograms of variant allele frequencies of samples grouped by patient.

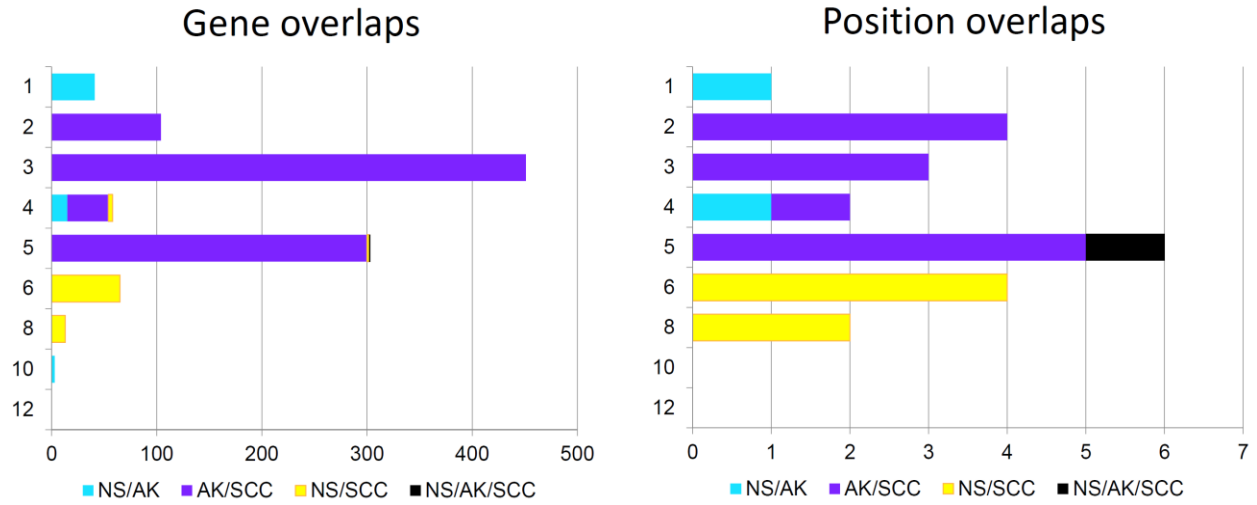

Supplementary Figure 4. Enumeration of overlaps between mutated genes and variant positions within mutated genes within samples. Overlaps in non-silent SNVs at the gene and position level are enumerated here.

a

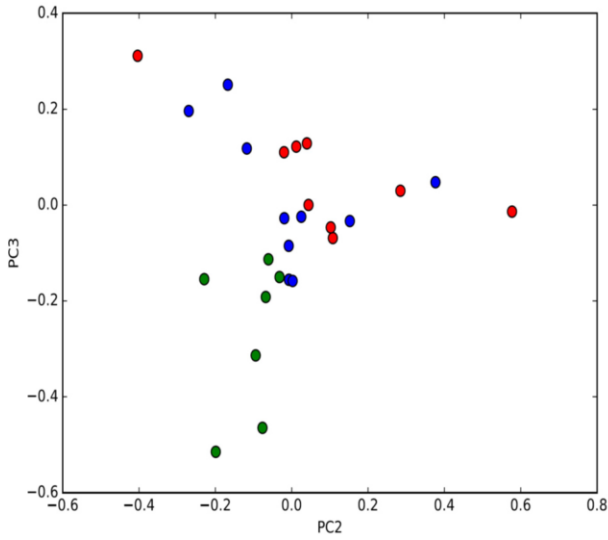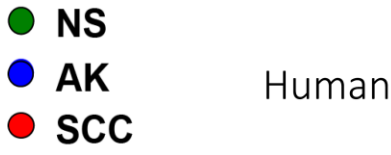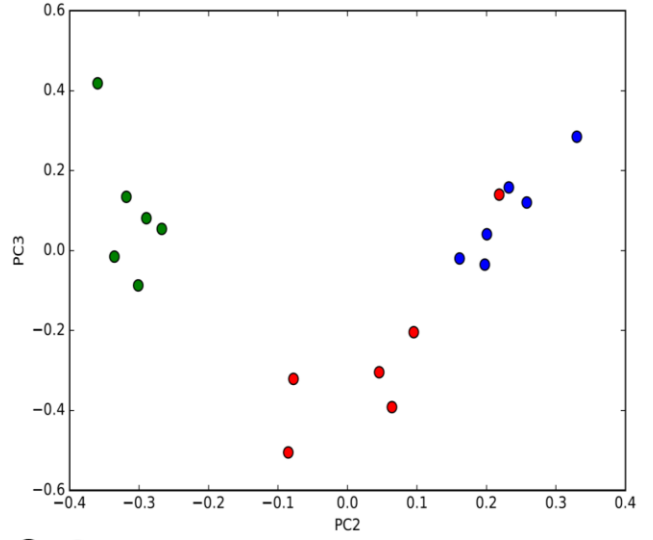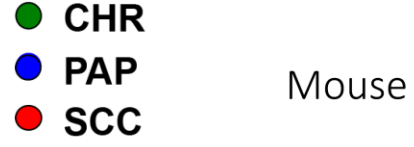

b

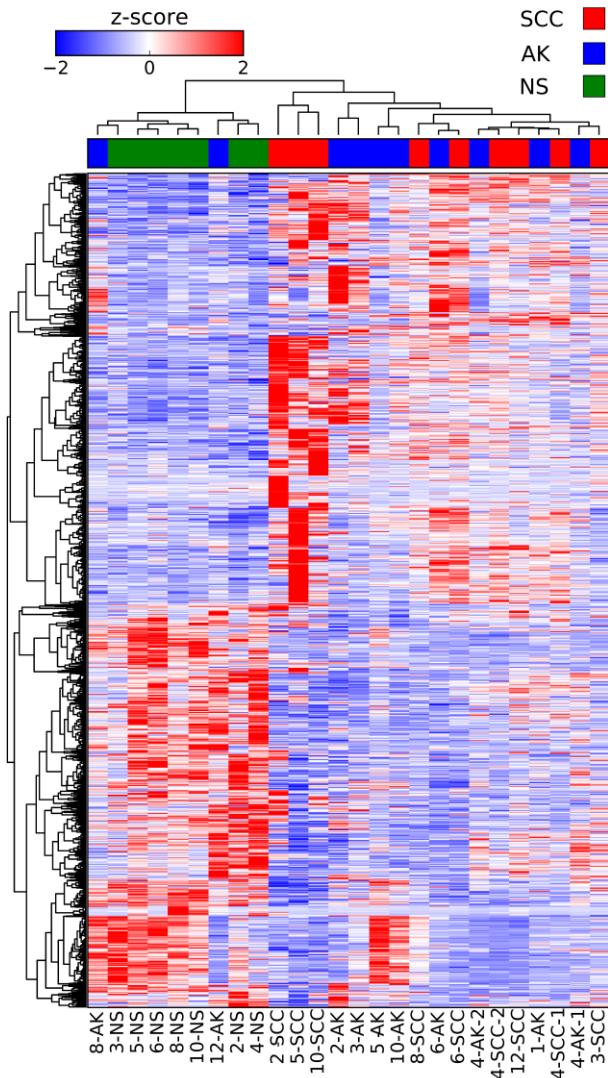

c

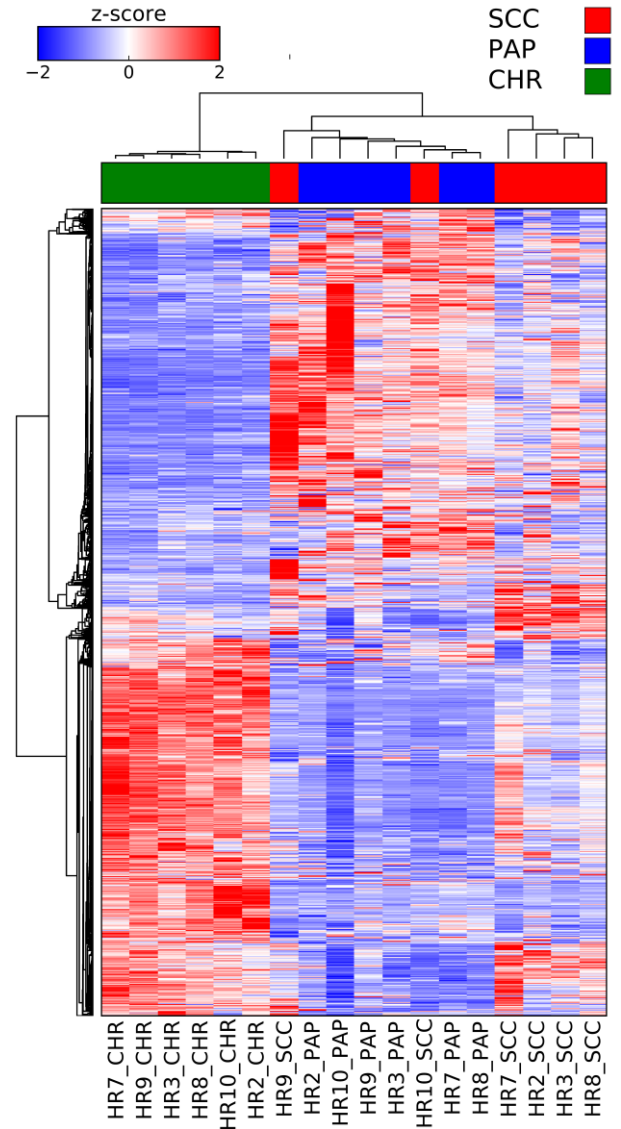

Supplementary Figure 5. Analysis of mRNA expression in human and mouse lesions. (a) Principal component analysis of unsupervised mRNA expression. Using principal component analysis across three dimensions as an alternative means of organizing the transcriptional profiles, the results of the unsupervised clustering are largely recapitulated: cuSCC and AK/PAP segregate away from NS most prominently. (b) Clustering of recurrently differentially expressed human genes in at least 2 of 3 possible pairwise comparisons between NS, AK, and cuSCC shows that AKs cluster predominantly with cuSCC, consistent with the notion that they are largely transcriptomically more similar to cuSCC. (c) Clustering of recurrently differentially expressed mouse genes in at least 2 of 3 possible pairwise comparisons between CHR, PAP, and cuSCC shows that PAP cluster predominantly with cuSCC, consistent with the notion that they are largely transcriptomically more similar to cuSCC.

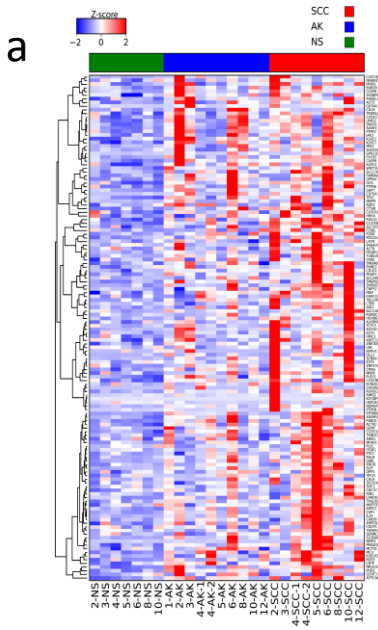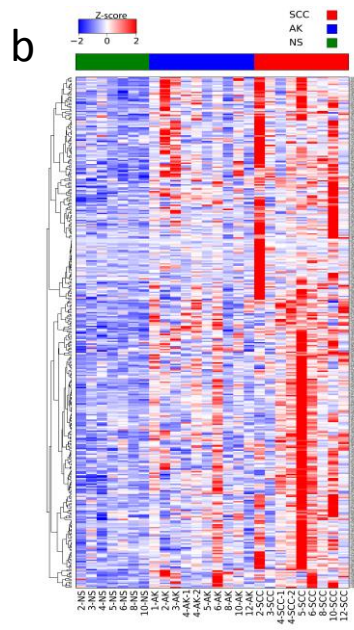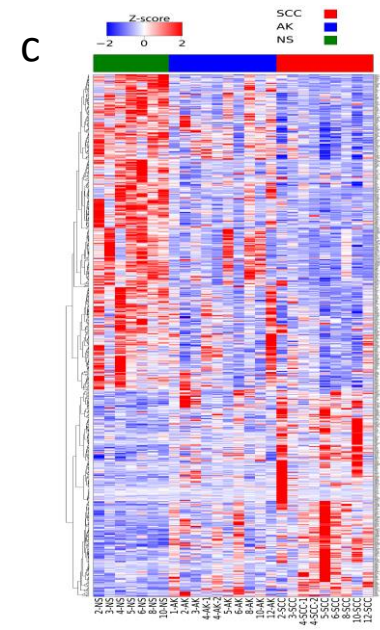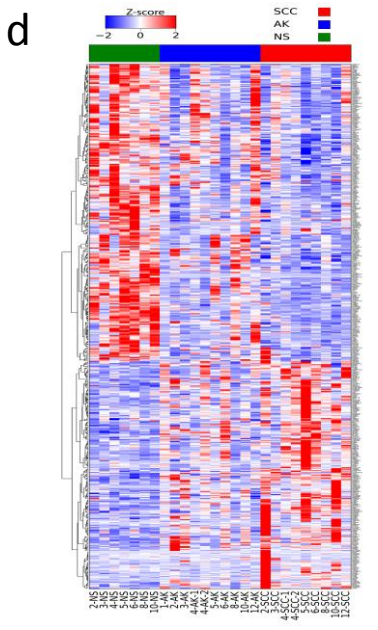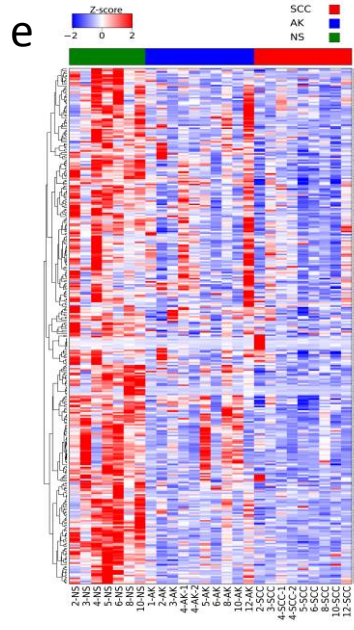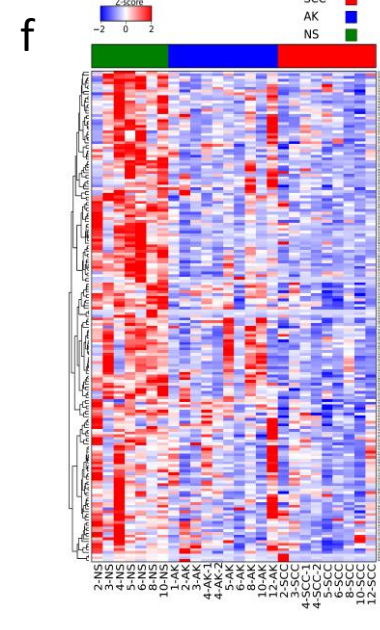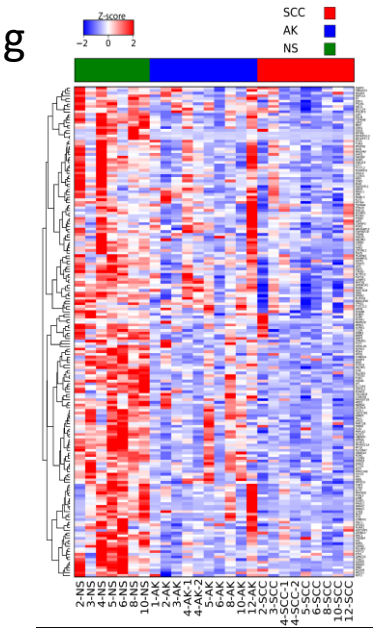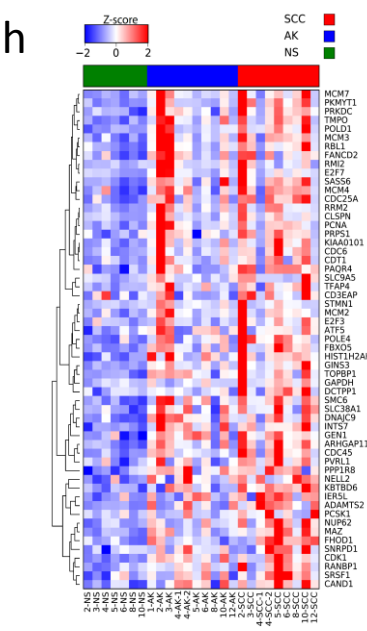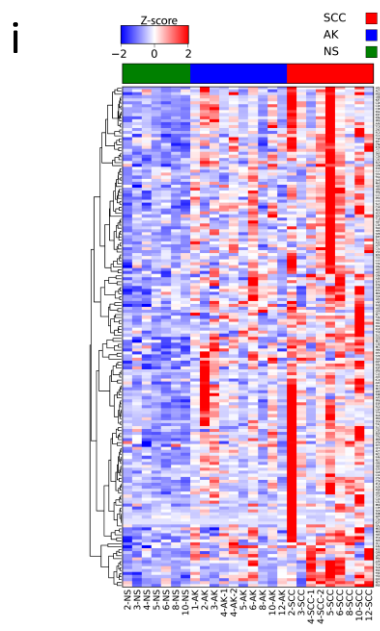



Supplementary Figure 6. TRANSFAC based analysis of transcription factor regulators. (a) ETS2 targets and (b) SP1 target are upregulated across the continuum of samples. (c) TCF3 targets that are overall downregulated have greater significance across the continuum than those that are upregulated in the late stage transition (AK/PAP to cuSCC). (d) LEF1 targets also exhibit a similar mixed pattern, with one subset of target genes with significant downregulation early (NS/CHR to AK/PAP) and a distinct subset showing upregulation late (AK/PAP to cuSCC). The majority of NFAT targets (e) also exhibit downregulation early. (f) AP1 and (g) FREAC2 (FOXF2) targets are downregulated across the continuum of cuSCC development. Targets of (h) E2F and (i) NFY are significantly upregulated early (NS to AK/PAP) and these were also highlighted in the linear mixed-effects (LME) model of progression which are highlighted in red in panel (Fig. 5a).

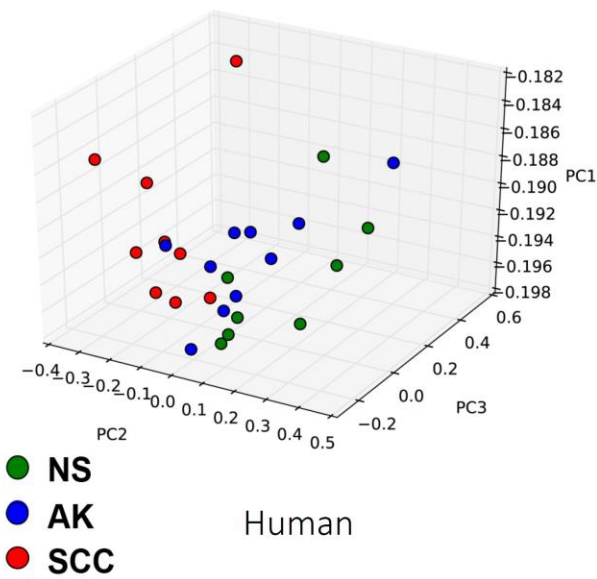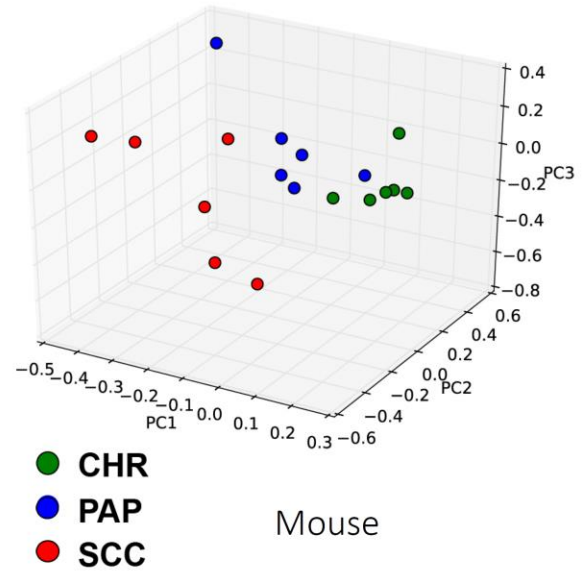

Supplementary Figure 7. Principal component analysis of unsupervised microRNA expression. Using principal component analysis across three dimensions as an alternative means of organizing the microRNA profiles, the results of the unsupervised clustering are largely recapitulated: while NS/CHR are very distinctly separated from cuSCC, segregation of AK/PAP as a distinct group is more clearly seen here as compared to the principal component analysis of mRNA profiles, particularly in mouse.

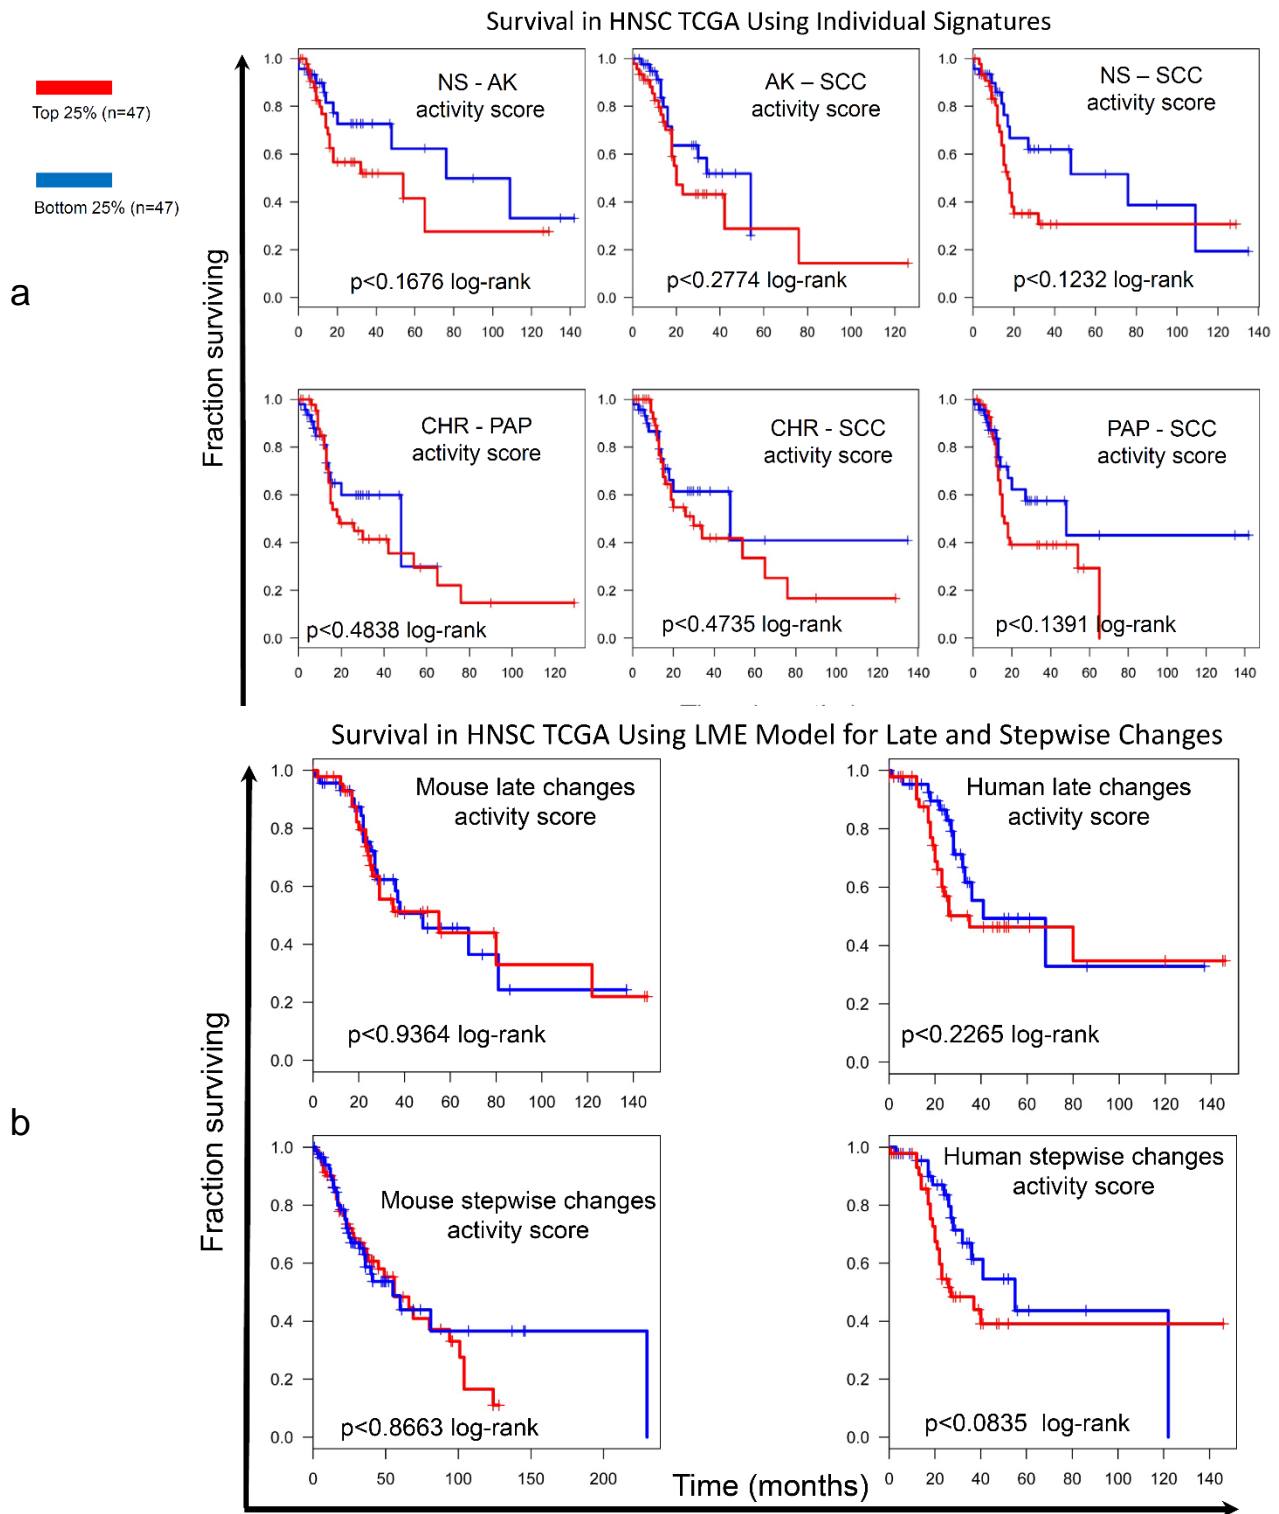

Supplementary Figure 8. Survival analysis for head & neck squamous cell carcinoma. (a) All of the individual signatures for all significant pairwise comparisons in human and mouse were probed for their ability to predict survival in *TP53*-mutant HNSCC in the top and bottom 25% of ranked signatures; none was significant. (b) The remaining late transition and stepwise (both

early and late) signatures from the LME model data were probed for their ability to predict survival in HNSCC; none was significant.

## Supplementary Tables

| Gene        | # | Patients        | Removed as common false positive genes: |   |                             |
|-------------|---|-----------------|-----------------------------------------|---|-----------------------------|
| GPR98       | 4 | PT1,PT2,PT3,PT4 | Gene                                    | # | Patients                    |
| MYO7B       | 4 | PT1,PT3,PT4,PT5 | TTN                                     | 7 | PT1,PT2,PT3,PT4,PT5,PT6,PT8 |
| RELN        | 4 | PT1,PT3,PT4,PT5 | MUC16                                   | 6 | PT1,PT2,PT3,PT4,PT5,PT6     |
| TP53        | 4 | PT1,PT3,PT4,PT5 | CSMD3                                   | 3 | PT2,PT3,PT5                 |
| CRB1        | 3 | PT2,PT3,PT6     | DNAH6                                   | 3 | PT2,PT3,PT6                 |
| FAT1        | 3 | PT3,PT4,PT5     | DNAH7                                   | 3 | PT3,PT5,PT6                 |
| FSIP2       | 3 | PT2,PT3,PT5     | HYDIN                                   | 3 | PT3,PT5,PT6                 |
| IGFN1       | 3 | PT2,PT3,PT5     | LRP1B                                   | 3 | PT1,PT3,PT5                 |
| MLL3        | 3 | PT2,PT5,PT6     | MUC4                                    | 3 | PT2,PT3,PT5                 |
| RYR1        | 3 | PT2,PT4,PT5     | SYNE1                                   | 3 | PT3,PT4,PT5                 |
| VWDE        | 3 | PT2,PT3,PT5     | ADAMTS20                                | 2 | PT2,PT4                     |
| ADAM29      | 2 | PT3,PT4         | CSMD1                                   | 2 | PT3,PT5                     |
| ADGB        | 2 | PT2,PT3         | CTTNBP2                                 | 2 | PT5,PT6                     |
| ANKRD31     | 2 | PT3,PT6         | DNAH10                                  | 2 | PT1,PT5                     |
| ATP8A1      | 2 | PT3,PT5         | DNAH14                                  | 2 | PT3,PT5                     |
| BTBD9       | 2 | PT3,PT5         | DNAH5                                   | 2 | PT2,PT4                     |
| C16orf62    | 2 | PT3,PT4         | DNAH8                                   | 2 | PT3,PT5                     |
| C2orf16     | 2 | PT4,PT5         | KALRN                                   | 2 | PT3,PT5                     |
| CCDC168     | 2 | PT3,PT5         | OR4K17                                  | 2 | PT3,PT5                     |
| CHD8        | 2 | PT1,PT4         | PCLC                                    | 2 | PT1,PT5                     |
| CLTCL1      | 2 | PT3,PT6         |                                         |   |                             |
| CMYA5       | 2 | PT4,PT5         |                                         |   |                             |
| COL11A1     | 2 | PT4,PT5         |                                         |   |                             |
| COL1A2      | 2 | PT3,PT5         |                                         |   |                             |
| COL24A1     | 2 | PT3,PT5         |                                         |   |                             |
| COL27A1     | 2 | PT4,PT5         |                                         |   |                             |
| COL4A2      | 2 | PT2,PT3         |                                         |   |                             |
| COL4A3      | 2 | PT3,PT4         |                                         |   |                             |
| COL6A5      | 2 | PT3,PT5         |                                         |   |                             |
| COL6A6      | 2 | PT2,PT5         |                                         |   |                             |
| CSF3R       | 2 | PT3,PT5         |                                         |   |                             |
| CXorf22     | 2 | PT3,PT4         |                                         |   |                             |
| DDX60L      | 2 | PT3,PT4         |                                         |   |                             |
| DENND4A     | 2 | PT4,PT5         |                                         |   |                             |
| DGKH        | 2 | PT4,PT5         |                                         |   |                             |
| DNHD1       | 2 | PT2,PT5         |                                         |   |                             |
| DPP3        | 2 | PT5,PT6         |                                         |   |                             |
| DYNC111     | 2 | PT3,PT5         |                                         |   |                             |
| ENPP3       | 2 | PT2,PT5         |                                         |   |                             |
| FAM135A     | 2 | PT5,PT8         |                                         |   |                             |
| FER1L6      | 2 | PT3,PT5         |                                         |   |                             |
| FGA         | 2 | PT3,PT5         |                                         |   |                             |
| FREM3       | 2 | PT3,PT5         |                                         |   |                             |
| FRY         | 2 | PT3,PT5         |                                         |   |                             |
| GLDN        | 2 | PT5,PT6         |                                         |   |                             |
| HMCN1       | 2 | PT3,PT5         |                                         |   |                             |
| KIAA1324L   | 2 | PT3,PT5         |                                         |   |                             |
| KIAA1549    | 2 | PT2,PT3         |                                         |   |                             |
| LAMA1       | 2 | PT3,PT4         |                                         |   |                             |
| LAMC3       | 2 | PT3,PT6         |                                         |   |                             |
| LGI1        | 2 | PT1,PT3         |                                         |   |                             |
| LRP2        | 2 | PT3,PT5         |                                         |   |                             |
| MLL2        | 2 | PT2,PT5         |                                         |   |                             |
| MYH2        | 2 | PT3,PT5         |                                         |   |                             |
| MYH4        | 2 | PT3,PT5         |                                         |   |                             |
| MYO18B      | 2 | PT3,PT4         |                                         |   |                             |
| NAV3        | 2 | PT2,PT5         |                                         |   |                             |
| NHSL2       | 2 | PT3,PT5         |                                         |   |                             |
| NPAP1       | 2 | PT3,PT5         |                                         |   |                             |
| PALM2-AKAP2 | 2 | PT2,PT3         |                                         |   |                             |
| PAPPA2      | 2 | PT3,PT5         |                                         |   |                             |
| POLR3A      | 2 | PT4,PT5         |                                         |   |                             |
| PRB4        | 2 | PT1,PT5         |                                         |   |                             |
| PRDM9       | 2 | PT4,PT5         |                                         |   |                             |
| PREX1       | 2 | PT2,PT4         |                                         |   |                             |
| PRKD1       | 2 | PT3,PT4         |                                         |   |                             |
| PRR16       | 2 | PT3,PT5         |                                         |   |                             |
| PRRC2A      | 2 | PT5,PT6         |                                         |   |                             |
| PRUNE2      | 2 | PT2,PT3         |                                         |   |                             |
| PTPRQ       | 2 | PT3,PT5         |                                         |   |                             |
| ROS1        | 2 | PT3,PT5         |                                         |   |                             |
| RP1         | 2 | PT3,PT5         |                                         |   |                             |
| SCAND3      | 2 | PT3,PT6         |                                         |   |                             |
| SLC12A3     | 2 | PT2,PT5         |                                         |   |                             |
| SLC26A7     | 2 | PT4,PT6         |                                         |   |                             |
| SPAG17      | 2 | PT3,PT5         |                                         |   |                             |
| STARD9      | 2 | PT1,PT3         |                                         |   |                             |
| TCF20       | 2 | PT5,PT6         |                                         |   |                             |
| THSD7A      | 2 | PT2,PT4         |                                         |   |                             |
| TMEM131     | 2 | PT2,PT5         |                                         |   |                             |
| TRDN        | 2 | PT1,PT3         |                                         |   |                             |
| TRIM58      | 2 | PT3,PT4         |                                         |   |                             |
| TRIM66      | 2 | PT2,PT4         |                                         |   |                             |
| TTC40       | 2 | PT3,PT6         |                                         |   |                             |
| USH2A       | 2 | PT2,PT6         |                                         |   |                             |
| VWF         | 2 | PT3,PT5         |                                         |   |                             |
| WBP2NL      | 2 | PT3,PT4         |                                         |   |                             |
| WBSCR17     | 2 | PT3,PT5         |                                         |   |                             |
| WDR87       | 2 | PT3,PT4         |                                         |   |                             |
| XIRP2       | 2 | PT2,PT3         |                                         |   |                             |
| ZFX4        | 2 | PT2,PT3         |                                         |   |                             |

Supplementary Table 1. Table of overlapping mutated genes across patients.

## MOUSE

| Top Canonical Pathways                            |          |
|---------------------------------------------------|----------|
| Name                                              | p-value  |
| Mitotic Roles of Polo-Like Kinase                 | 1.92E-09 |
| Cell Cycle Control of Chromosomal Replication     | 3.15E-09 |
| Cell Cycle: G2/M DNA Damage Checkpoint Regulation | 5.77E-06 |
| Hereditary Breast Cancer Signaling                | 7.97E-06 |
| Role of BRCA1 in DNA Damage Response              | 4.48E-05 |

| Top Upstream Regulators |                    |
|-------------------------|--------------------|
| Upstream Regulator      | p-value of overlap |
| E2F4                    | 1.00E-31           |
| RABL6                   | 2.58E-25           |
| ERBB2                   | 1.42E-18           |
| TP53                    | 1.16E-15           |
| E2F1                    | 1.99E-15           |

## HUMAN

| Top Canonical Pathways                            |          |
|---------------------------------------------------|----------|
| Name                                              | p-value  |
| Cell Cycle Control of Chromosomal Replication     | 3.19E-09 |
| Mitotic Roles of Polo-Like Kinase                 | 1.42E-08 |
| Hereditary Breast Cancer Signaling                | 2.85E-05 |
| Cell Cycle: G2/M DNA Damage Checkpoint Regulation | 3.45E-05 |
| Role of BRCA1 in DNA Damage Response              | 4.53E-05 |

| Top Upstream Regulators |                    |
|-------------------------|--------------------|
| Upstream Regulator      | p-value of overlap |
| E2F4                    | 1.06E-31           |
| RABL6                   | 5.21E-24           |
| ERBB2                   | 9.64E-18           |
| TP53                    | 4.02E-15           |
| CDK4                    | 4.09E-15           |

Supplementary Table 2. Ingenuity Pathway Analysis of differentially expressed genes in the early (NS/CHR to AK/PAP) transition. Using the significantly differentially expressed genes in the early transition from NS/CHR to AK/PAP in the linear mixed effects model, IPA analysis was conducted separately for human and mouse genes. There is striking similarity in the key canonical pathways and upstream regulators identified.
